# Supplementary material for: A chemoenzymatic strategy for the efficient synthesis of amphenicol antibiotic chloramphenicol mediated by an engineered l-threonine transaldolase with high activity and stereoselectivity
Source: Royal Society of Chemistry journal article supplement (doi:10.1039/d2cy01670b), 2022-12-09
Supplement: d2cy01670b1.pdf [file d2cy01670b1.pdf]

1 **Supporting Information**

2

3 A chemo-enzymatic strategy for efficient synthesis of  
4 amphenicol antibiotic chloramphenicol mediated by an  
5 engineered L-threonine transaldolase with high activity and  
6 stereoselectivity

7

8 Lian Xu, Dan Nie, Bing-Mei Su, Xin-Qi Xu, Juan Lin \*

9

10 College of Biological Science and Engineering, Fuzhou University, Fuzhou 350116,  
11 China.

12

13 \* To whom correspondence should be addressed: [ljuan@fzu.edu.cn](mailto:ljuan@fzu.edu.cn) (Juan Lin).

14

15 Running title: Chemo-enzymatic strategy for synthesis of chloramphenicol

16 **Table S1.** Primers used for site-directed mutagenesis of PsLTTA.

| Primer              | Sequence (5'-3')                  |
|---------------------|-----------------------------------|
| N35A F <sup>a</sup> | GACCGCAgcaGAAAATTATCCGAGCGC       |
| N35A R              | AATTTTCtgcTGCGGTCAGGCTCAGGC       |
| N35S F              | GACCGCAagcGAAAATTATCCGAGCGC       |
| N35S R              | AATTTTCgctTGCGGTCAGGCTCAGGC       |
| N35C F              | GACCGCAtgtGAAAATTATCCGAGCGC       |
| N35C R              | AATTTTCacaTGCGGTCAGGCTCAGGC       |
| N35V F              | GACCGCAgttGAAAATTATCCGAGCGC       |
| N35V R              | AATTTTCaacTGCGGTCAGGCTCAGGC       |
| N35I F              | GACCGCAattGAAAATTATCCGAGCGC       |
| N35I R              | AATTTTCaatTGCGGTCAGGCTCAGGC       |
| N35G F              | GACCGCAggcGAAAATTATCCGAGCGC       |
| N35G R              | AATTTTCgccTGCGGTCAGGCTCAGGC       |
| Y55N F              | GCATTTaatCATTGTAGCTTTCCGTTT       |
| Y55N R              | ACAATGattAAATGCGCCTGCGGTGCT       |
| Y55L F              | GCATTTctgCATTGTAGCTTTCCGTTT       |
| Y55L R              | ACAATGcagAAATGCGCCTGCGGTGCT       |
| Y55T F              | GCATTTaccCATTGTAGCTTTCCGTTT       |
| Y55T R              | ACAATGggtAAATGCGCCTGCGGTGCT       |
| Y55S F              | GCATTTagcCATTGTAGCTTTCCGTTT       |
| Y55S R              | ACAATGgctAAATGCGCCTGCGGTGCT       |
| Y55A F              | GCATTTgcaCATTGTAGCTTTCCGTTT       |
| Y55A R              | ACAATGtgcAAATGCGCCTGCGGTGCT       |
| C57I F              | TTATCATattAGCTTTCCGTTTGAAGTTCC    |
| C57I R              | GAAAGCTaatATGATAAAATGCGCCTGC      |
| C57M F              | TTATCATatgAGCTTTCCGTTTGAAGTTCC    |
| C57M R              | GAAAGCTcatATGATAAAATGCGCCTGC      |
| C57V F              | TTATCATgttAGCTTTCCGTTTGAAGTTCC    |
| C57V R              | GAAAGCTaacATGATAAAATGCGCCTGC      |
| C57A F              | TTATCATgcaAGCTTTCCGTTTGAAGTTCC    |
| C57A R              | GAAAGCTtgcATGATAAAATGCGCCTGC      |
| F59A F              | TGTAGCgcaCCGTTTGAAGTTCCGGCA       |
| F59A R              | AAACGGtgcGCTACAATGATAAAATGC       |
| F59I F              | TGTAGCattCCGTTTGAAGTTCCGGCA       |
| F59I R              | AAACGGaatGCTACAATGATAAAATGC       |
| F59V F              | TGTAGCggtCCGTTTGAAGTTCCGGCA       |
| F59V R              | AAACGGaacGCTACAATGATAAAATGC       |
| F59S F              | TGTAGCagcCCGTTTGAAGTTCCGGCA       |
| F59S R              | AAACGGgctGCTACAATGATAAAATGC       |
| F59L F              | TGTAGCctgCCGTTTGAAGTTCCGGCA       |
| F59L R              | AAACGGcagGCTACAATGATAAAATGC       |
| C57I-F59A F         | TATCATattAGCgcaCCGTTTGAAGTTCCGGCA |
| C57I-F59A R         | AAACGGtgcGCTaatATGATAAAATGCGCCTGC |
| F61A F              | TTTCCGgcaGAAGTTCCGGCAGGCGAA       |
| F61A R              | AACTTCtgcCGGAAAGCTACAATGATA       |
| F61I F              | TTTCCGgattGAAGTTCCGGCAGGCGAA      |
| F61I R              | AACTTCaatCGGAAAGCTACAATGATA       |
| F61V F              | TTTCCGggtGAAGTTCCGGCAGGCGAA       |
| F61V R              | AACTTCaacCGGAAAGCTACAATGATA       |
| F61S F              | TTTCCGgagGAAGTTCCGGCAGGCGAA       |
| F61S R              | AACTTCgctCGGAAAGCTACAATGATA       |
| F61L F              | TTTCCGctgGAAGTTCCGGCAGGCGAA       |
| F61L R              | AACTTCcagCGGAAAGCTACAATGATA       |
| P64A F              | GAAGTTagcGCAGGCGAATGGCATT         |
| P64A R              | GCCTGCgctAACTTCAAACGGAAAGCT       |

|         |        |      |                          |           |
|---------|--------|------|--------------------------|-----------|
| P64A F  | GAAGTT | agc  | GCAGGCGAATGGC            | ATTTT     |
| P64A R  | GCCTGC | gct  | AACTTCAAACGGAAAGCT       |           |
| P64G F  | GAAGTT | ggt  | GCAGGCGAATGGC            | ATTTT     |
| P64G R  | GCCTGC | cacc | AACTTCAAACGGAAAGCT       |           |
| P64V F  | GAAGTT | gtt  | GCAGGCGAATGGC            | ATTTT     |
| P64V R  | GCCTGC | caac | AACTTCAAACGGAAAGCT       |           |
| W68A F  | GGCGAA | agca | CATTTTCCGGAACCGGGT       |           |
| W68A R  | AAAATG | tgc  | TTCGCCTGCCGGA            | ACTTCAAA  |
| W68F F  | GGCGAA | attt | CATTTTCCGGAACCGGGT       |           |
| W68F R  | AAAATG | aaa  | TTCGCCTGCCGGA            | ACTTCAAA  |
| W68L F  | GGCGAA | actg | CATTTTCCGGAACCGGGT       |           |
| W68L R  | AAAATG | cag  | TTCGCCTGCCGGA            | ACTTCAAA  |
| W68Q F  | GGCGAA | acag | CATTTTCCGGAACCGGGT       |           |
| W68Q R  | AAAATG | ctg  | TTCGCCTGCCGGA            | ACTTCAAA  |
| W68S F  | GGCGAA | agc  | CATTTTCCGGAACCGGGT       |           |
| W68S R  | AAAATG | gct  | TTCGCCTGCCGGA            | ACTTCAAA  |
| H69F F  | GAATGG | ttt  | TTCGGAACCGGGT            | CAT       |
| H69F R  | CGGAAA | aaa  | CCATTTCGCCTGCCGGAAC      |           |
| H69Y F  | GAATGG | tat  | TTCGGAACCGGGT            | CAT       |
| H69Y R  | CGGAAA | ata  | CCATTTCGCCTGCCGGAAC      |           |
| H69V F  | GAATGG | gtt  | TTCGGAACCGGGT            | CAT       |
| H69V R  | CGGAAA | aac  | CCATTTCGCCTGCCGGAAC      |           |
| H69L F  | GAATGG | ctg  | TTCGGAACCGGGT            | CAT       |
| H69L R  | CGGAAA | acag | CCATTTCGCCTGCCGGAAC      |           |
| H69A F  | GAATGG | gca  | TTCGGAACCGGGT            | CAT       |
| H69A R  | CGGAAA | atg  | CCATTTCGCCTGCCGGAAC      |           |
| H69I F  | GAATGG | att  | TTCGGAACCGGGT            | CAT       |
| H69I R  | CGGAAA | aat  | CCATTTCGCCTGCCGGAAC      |           |
| H126A F | TTTGCA | agca | CGTGATGGTGGT             | CATTTTGCC |
| H126A R | ATCACG | tgc  | TGCAAAATGAACAAAACCTTC    |           |
| H126T F | TTTGCA | aacc | CGTGATGGTGGT             | CATTTTGCC |
| H126T R | ATCACG | ggt  | TGCAAAATGAACAAAACCTTC    |           |
| H126S F | TTTGCA | aage | CGTGATGGTGGT             | CATTTTGCC |
| H126S R | ATCACG | gct  | TGCAAAATGAACAAAACCTTC    |           |
| H126L F | TTTGCA | actg | CGTGATGGTGGT             | CATTTTGCC |
| H126L R | ATCACG | cag  | TGCAAAATGAACAAAACCTTC    |           |
| H132A F | GGTCAT | gca  | GCCCTGGAAAGCCTGGCA       |           |
| H132A R | CAGGGC | ctgc | ATGACCACCATCACGATG       |           |
| H132V F | GGTCAT | gtt  | GCCCTGGAAAGCCTGGCA       |           |
| H132V R | CAGGGC | caac | ATGACCACCATCACGATG       |           |
| H132L F | GGTCAT | ctg  | GCCCTGGAAAGCCTGGCA       |           |
| H132L R | CAGGGC | cag  | ATGACCACCATCACGATG       |           |
| H132N F | GGTCAT | aat  | GCCCTGGAAAGCCTGGCA       |           |
| H132N R | CAGGGC | att  | ATGACCACCATCACGATG       |           |
| S180V F | GACCAG | ggt  | TTTAAACTGCGTTGGCAG       |           |
| S180V R | TTTAAA | aac  | CTGGTCCAGAATAACAATACGAAT |           |
| S180I F | GACCAG | att  | TTTAAACTGCGTTGGCAG       |           |
| S180I R | TTTAAA | aat  | CTGGTCCAGAATAACAATACGAAT |           |
| S180A F | GACCAG | gca  | TTTAAACTGCGTTGGCAG       |           |
| S180A R | TTTAAA | atg  | CTGGTCCAGAATAACAATACGAAT |           |
| S180G F | GACCAG | ggc  | TTTAAACTGCGTTGGCAG       |           |
| S180G R | TTTAAA | agc  | CTGGTCCAGAATAACAATACGAAT |           |
| S180V F | GACCAG | ggt  | TTTAAACTGCGTTGGCAG       |           |
| S180V R | TTTAAA | aac  | CTGGTCCAGAATAACAATACGAAT |           |
| C262A F | TGGGTT | gca  | CCGCATCTGCAGAGCAAT       |           |
| C262A R | ATGCGG | tgc  | AACCCACAGGCTGGTATC       |           |
| C262I F | TGGGTT | att  | CCGCATCTGCAGAGCAAT       |           |

|         |                                |
|---------|--------------------------------|
| C262I R | ATGCGGaatAACCCACAGGCTGGTATC    |
| C262V F | TGGGTTgttCCGCATCTGCAGAGCAAT    |
| C262V R | ATGCGGaacAACCCACAGGCTGGTATC    |
| C262L F | TGGGTTctgCCGCATCTGCAGAGCAAT    |
| C262L R | ATGCGGcagAACCCACAGGCTGGTATC    |
| P263A F | GTTTGTgcaCATCTGCAGAGCAATTGT    |
| P263A R | CAGATGtgcACAAACCCACAGGCTGGT    |
| P263G F | GTTTGTggcCATCTGCAGAGCAATTGT    |
| P263G R | CAGATGgccACAAACCCACAGGCTGGT    |
| P263V F | GTTTGTgttCATCTGCAGAGCAATTGT    |
| P263V R | CAGATGaacACAAACCCACAGGCTGGT    |
| S267A F | TGCAGgcaAATTGTCATGCCGAACAGCTGC |
| S267A R | CAATTtgcGATGCGGACAAACCCACAGG   |
| S267V F | TGCAGgttAATTGTCATGCCGAACAGCTGC |
| S267V R | CAATTaacGATGCGGACAAACCCACAGG   |
| S267G F | TGCAGggcAATTGTCATGCCGAACAGCTGC |
| S267G R | CAATTgccGATGCGGACAAACCCACAGG   |
| S267I F | TGCAGattAATTGTCATGCCGAACAGCTGC |
| S267I R | CAATTaatGATGCGGACAAACCCACAGG   |

---

17 <sup>a</sup>: the replacement nucleotide sequences were shown in lower case text.

18

19 **Figure S1.**

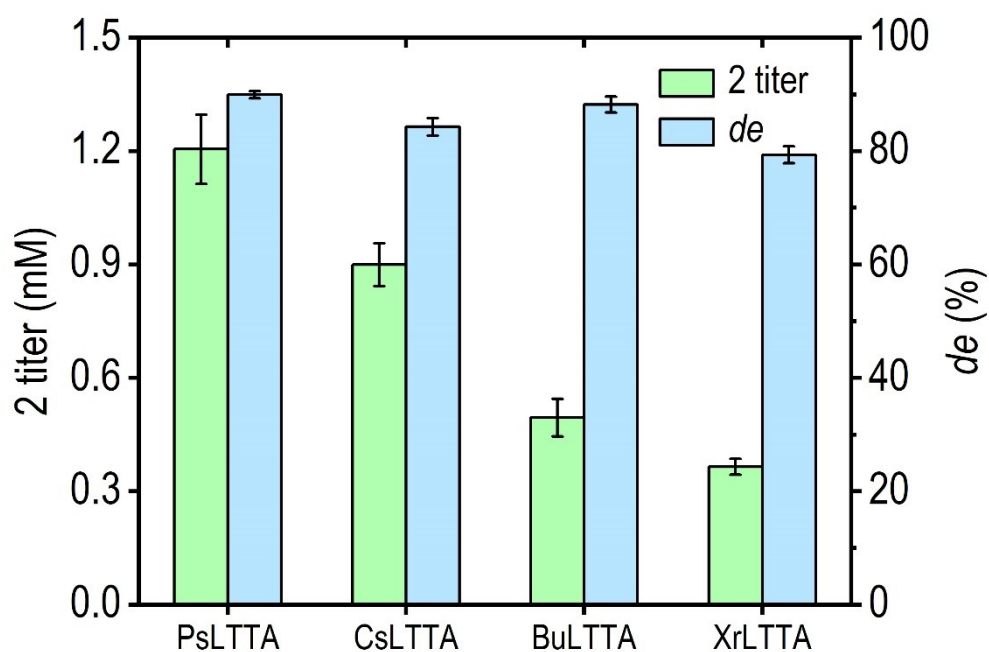

20

21 **Figure S1.** Four L-threonine transaldolase (PsLTTA, CsLTTA, BuLTTA and  
22 XrLTTA) were screened for synthesizing of **2**. Transaldol reaction was performed in a  
23 1 ml volume comprising 6 mM of L-threonine, 5 mM of **1**, 0.1 mM of PLP and 25 mg  
24 of whole-cell catalyst in Tris-HCl buffer (50 mM, pH 7.5) and incubated at 30°C with  
25 shaking for 2 h. After reaction, the pellets were removed by centrifugation and the  
26 supernatant was submitted for evaluating the conversion and stereoselectivity of **2** by  
27 chromatography analysis.

28

29 **Figure S2.**

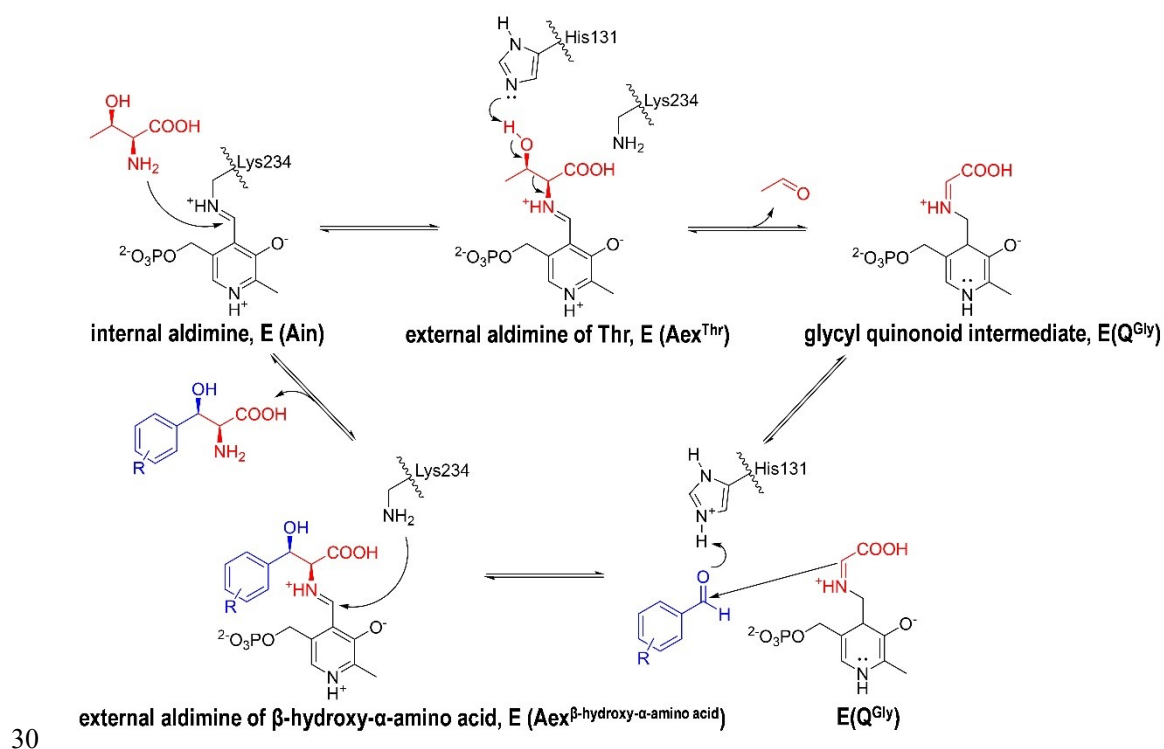

31 **Figure S2.** Based on the crystal structure of ObiH (PDB code: 7K34), the catalytic

32 mode of L-threonine transaldolase was a multi-stage reaction following a Ping-Pong

33 mechanism. The reaction is initiated by the binding of L-threonine to

34 phosphopyridoxal (PLP) to form an external aldimine of L-threonine ( $E(Aex^{Thr})$ ) and a

35 re-aldol cleavage is followed to produce a highly basic glycyl quinonoid intermediate

36  $Q^{Gly}$  and acetaldehyde. Then  $Q^{Gly}$  attacks on substrate aldehyde to form an external

37 aldimine of  $\beta$ -hydroxy- $\alpha$ -amino acid ( $E(Aex^{\beta\text{-hydroxy-}\alpha\text{-amino acid}})$ ) and the reintegration of

38 catalytic residue K234 with PLP is occurred to form an internal aldimine (Ain),

39 leading to the release of  $\beta$ -hydroxy- $\alpha$ -amino acids.

40

41 **Figure S3.**

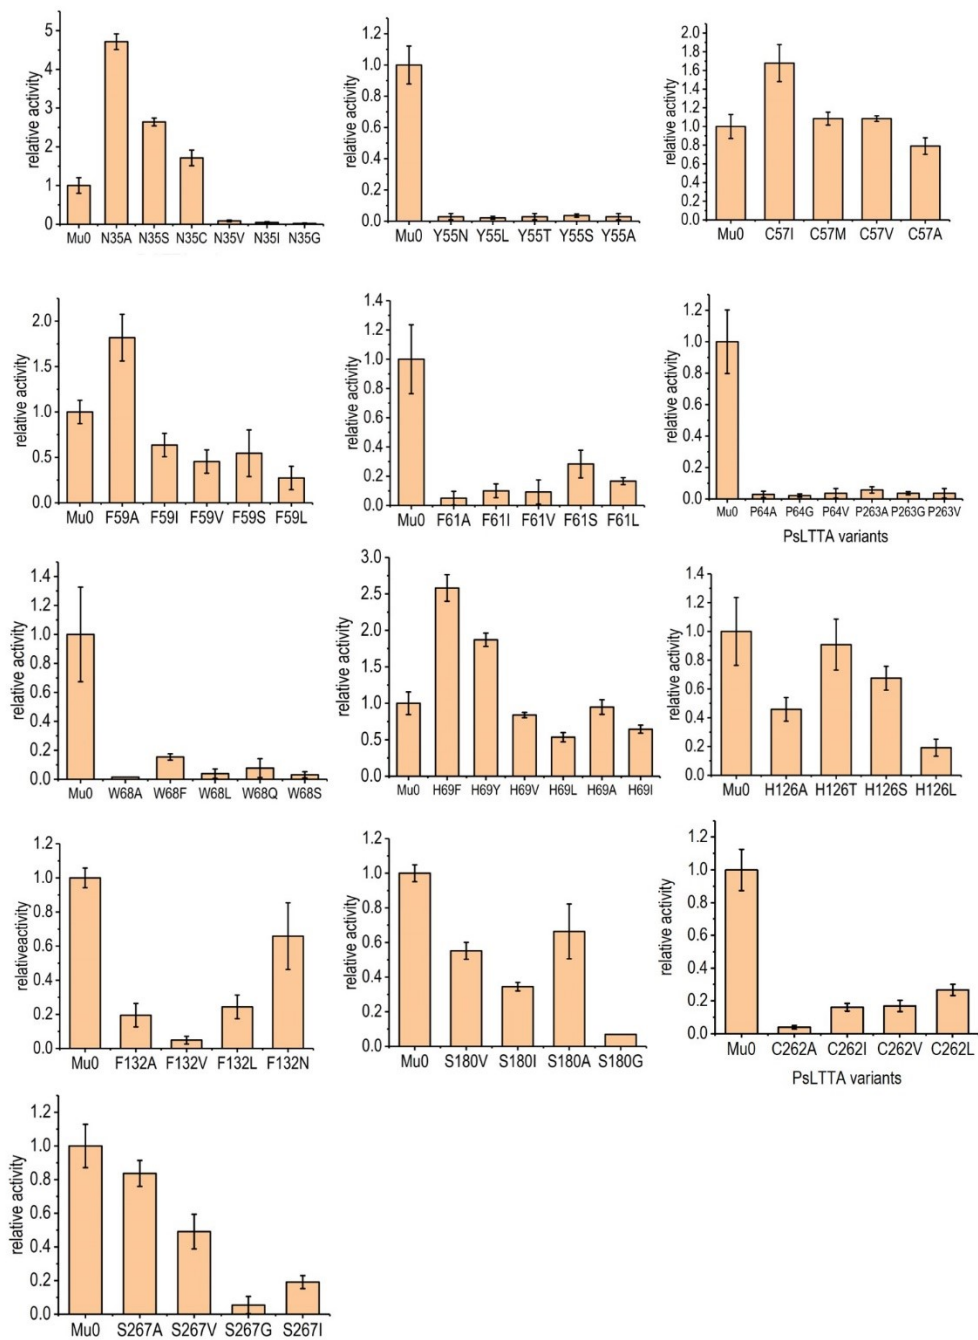

42

43 **Figure S3.** The activities of PsLTTA variants were screened by high-throughput  
 44 screening method. The reaction catalyzed by wild-type PsLTTA (Mu0) was used as a  
 45 control. All experiments were conducted in triplicate and the results were represented  
 46 as the mean  $\pm$  standard deviation.

48 **Figure S4.**

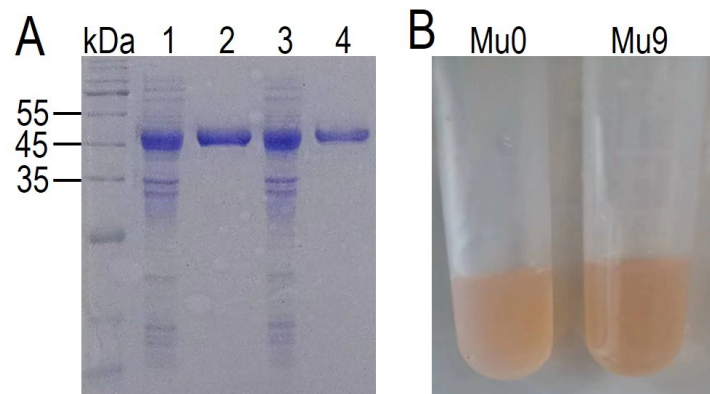

49

50 **Figure S4.** (A) SDS-PAGE analysis of PsLTTA-Mu0 and PsLTTA-Mu9. Lane 1,  
51 whole cell extract of PsLTTA-Mu0; Lane 2, purified PsLTTA-Mu0; Lane 3, whole  
52 cell extract of PsLTTA-Mu9; Lane 4, purified PsLTTA-Mu9. (B) The purified  
53 PsLTTA-Mu0 and PsLTTA-Mu9 were pink in solution.

54

55



56 **Figure S5.**

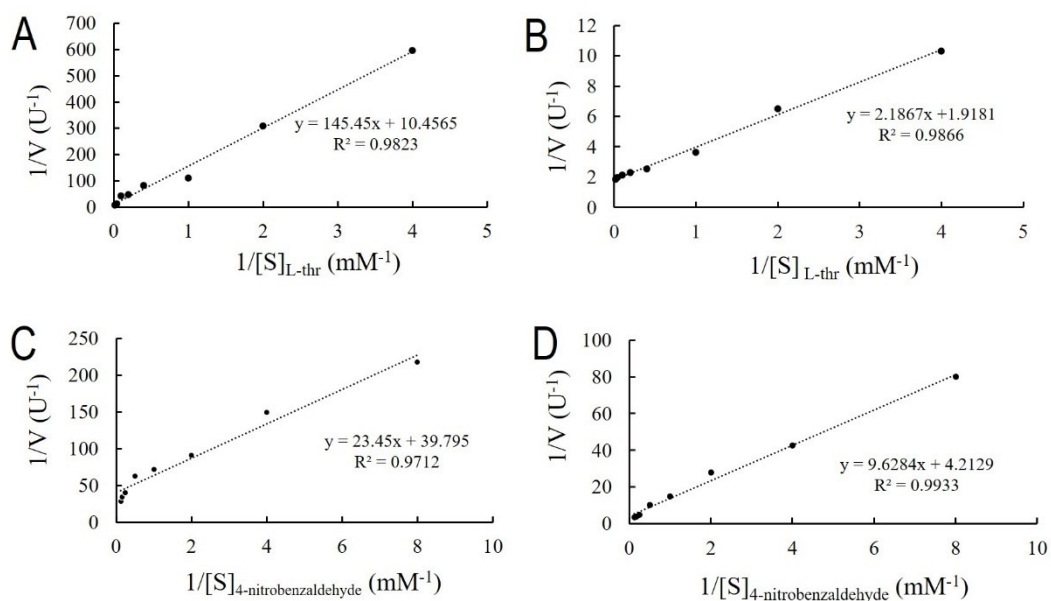

57

58 **Figure S5.** The kinetic plots of PsLTTA-Mu0 and PsLTTA-Mu9 toward substrates **1**

59 and L-threonine.  $V$ : reaction rate;  $[S]$ : substrate concentration.

60

61 **Figure S6.**

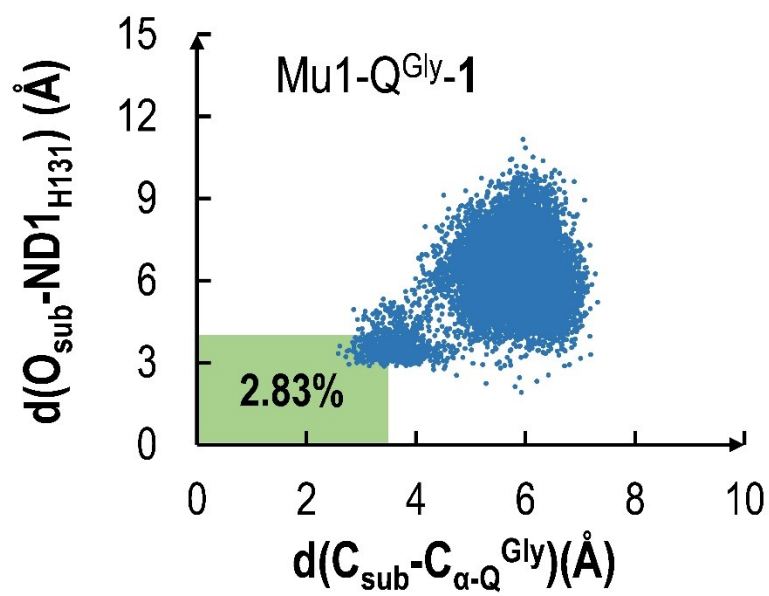

62

63 **Figure S6.** Conformation maps of Mu1-Q<sup>Gly</sup>-1. The limit of “catalytic distance”

64  $d(\text{O}_{\text{sub}}-\text{ND1}_{\text{H131}}) < 4.0$  Å and  $d(\text{C}_{\text{sub}}-\text{C}_{\alpha\text{-Q}}^{\text{Gly}}) < 3.5$  Å are colored by green.

65

66 **Figure S7.**

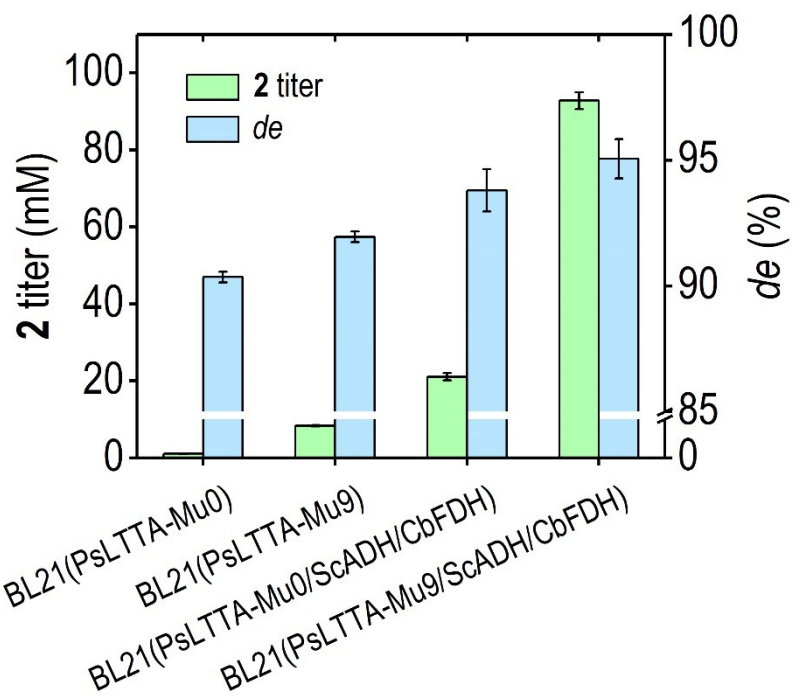

67

68 **Figure S7.** The yield and *de* of **2** synthesized by whole-cell catalyst BL21(PsLTTA-

69 Mu0), BL21(PsLTTA-Mu9), BL21(PsLTTA-Mu0/ScADH/CbFDH) and

70 BL21(PsLTTA-Mu9/ScADH/CbFDH).

71

72

73 **Figure S8.**

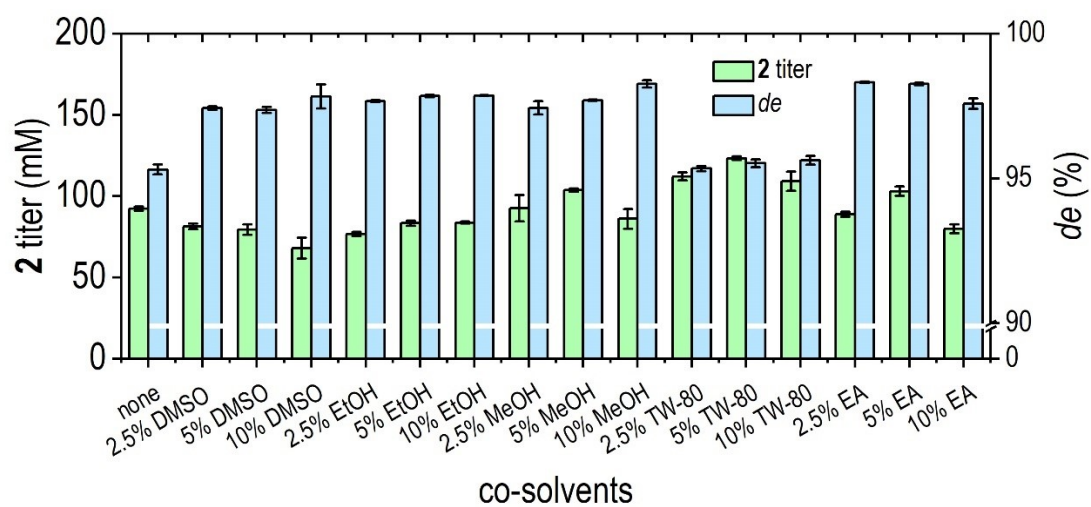

74

75 **Figure S8.** The optimization of co-solvents addition on the synthesis of **2**. Transaldol  
76 reaction was performed at 30 °C and 200 rpm for 2 h, in 1 mL of Tris-HCl buffer (50  
77 mM, pH 7.5) containing 50 mg/mL of whole-cell catalyst, 200 mM **1**, 220 mM L-  
78 threonine, 250 mM sodium formate, 0.1 mM PLP and 0.3 mM NAD<sup>+</sup>. The conversion  
79 and stereospecificity of **2** were detected by chromatography analysis.

80

81 **Figure S9.**

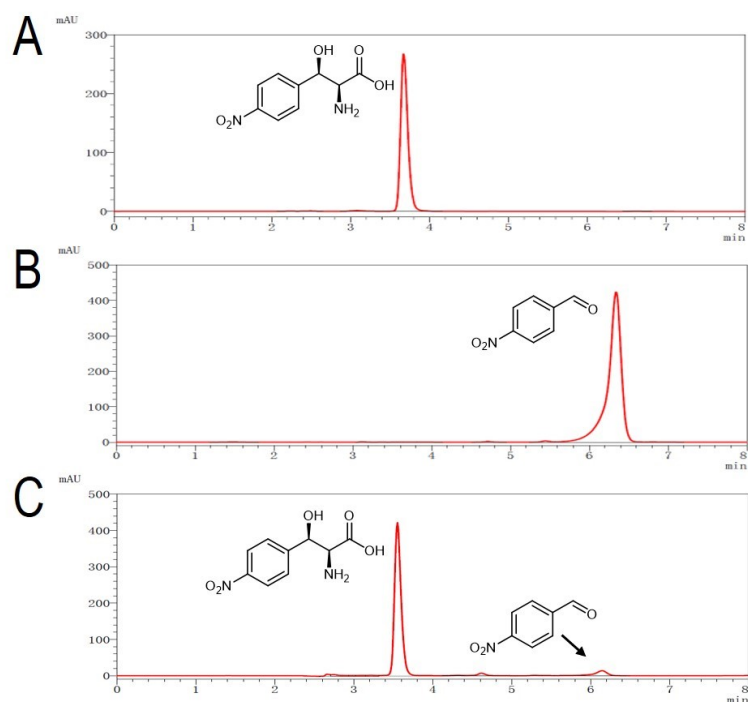

82

83 **Figure S9.** HPLC chromatogram of sample from bio-catalysis of **1** to **2** with whole  
84 cell catalyst BL21(PsLTTA-Mu9/ScADH/CbFDH). (A) HPLC chromatogram of **2**  
85 standard (t=3.6 min). (B) HPLC chromatogram of **1** standard (t=6.1 min). (C) HPLC  
86 chromatogram of sample catalyzed by whole cell catalyst BL21(PsLTTA-  
87 Mu9/ScADH/CbFDH).

88

89 **Figure S10.**

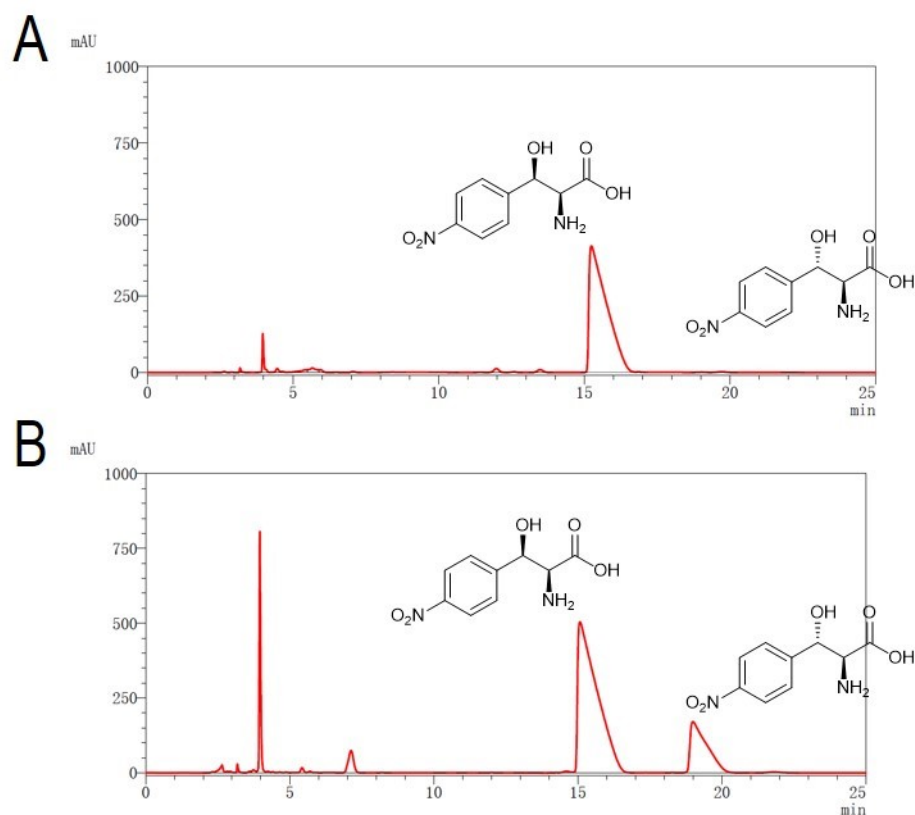

90

91 **Figure S10.** Chiral HPLC chromatograms of 2-amino-3-hydroxy-3-(4-  
92 nitrophenyl)propanoic acid. (A) Transaldol reaction catalyzed by whole cell catalyst  
93 BL21(PsLTTA-Mu9/ScADH/CbFDH) with 98.9% *de*. 2-amino-3-hydroxy-3-(4-  
94 nitrophenyl)propanoic acid ( $t_{(2S, 3R)}=15.3$  min,  $t_{(2S, 3S)}=19.2$  min). (B) Transaldol  
95 reaction catalyzed L-Threonine aldolase with 62% *de* was selected as a control. 2-  
96 amino-3-hydroxy-3-(4-nitrophenyl)propanoic acid ( $t_{(2S, 3R)}=15.2$  min,  $t_{(2S, 3S)}=19.1$   
97 min).

98

99 **Figure S11.**

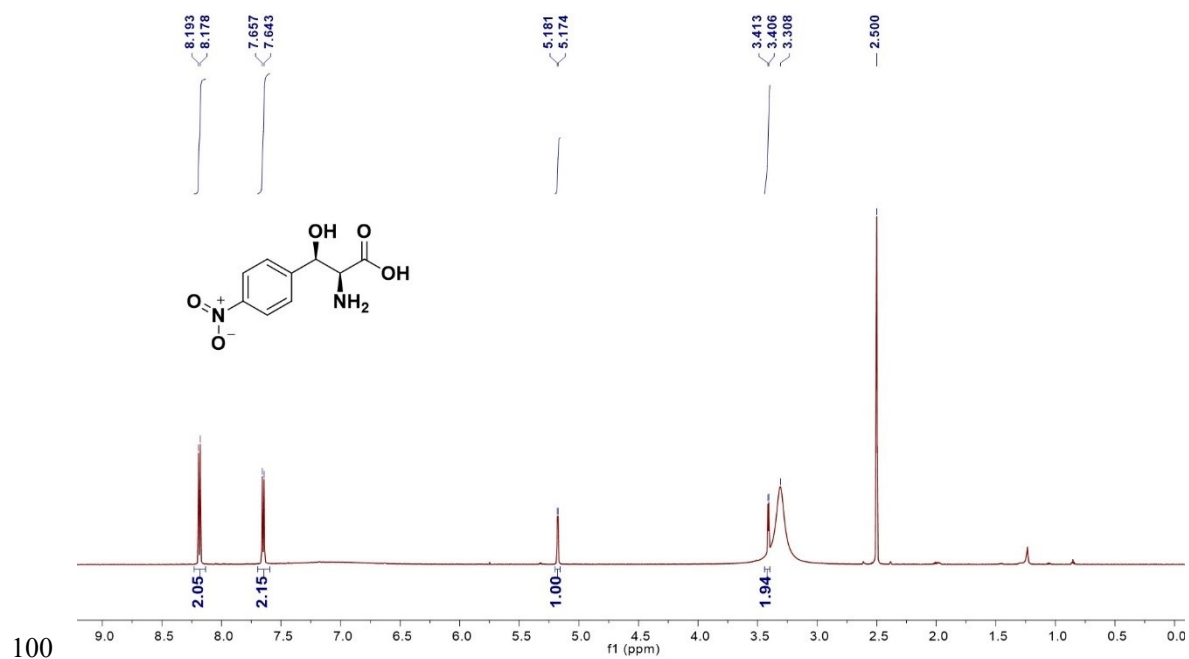

101 **Figure S11.** <sup>1</sup>H- NMR spectra of (2*S*,3*R*)-2-amino-3-hydroxy-3-(4-  
102 nitrophenyl)propanoic acid (**2**). <sup>1</sup>H NMR (600 MHz, DMSO-*d*<sub>6</sub>) δ (ppm) = 8.18 (d, *J*  
103 = 9.0 Hz, 2H), 7.62 (d, *J* = 8.4 Hz, 1H), 5.18 (d, *J* = 4.2 Hz, 1H), 3.41 (d, *J* = 4.2 Hz,  
104 1H).

105

106 **Figure S12.**

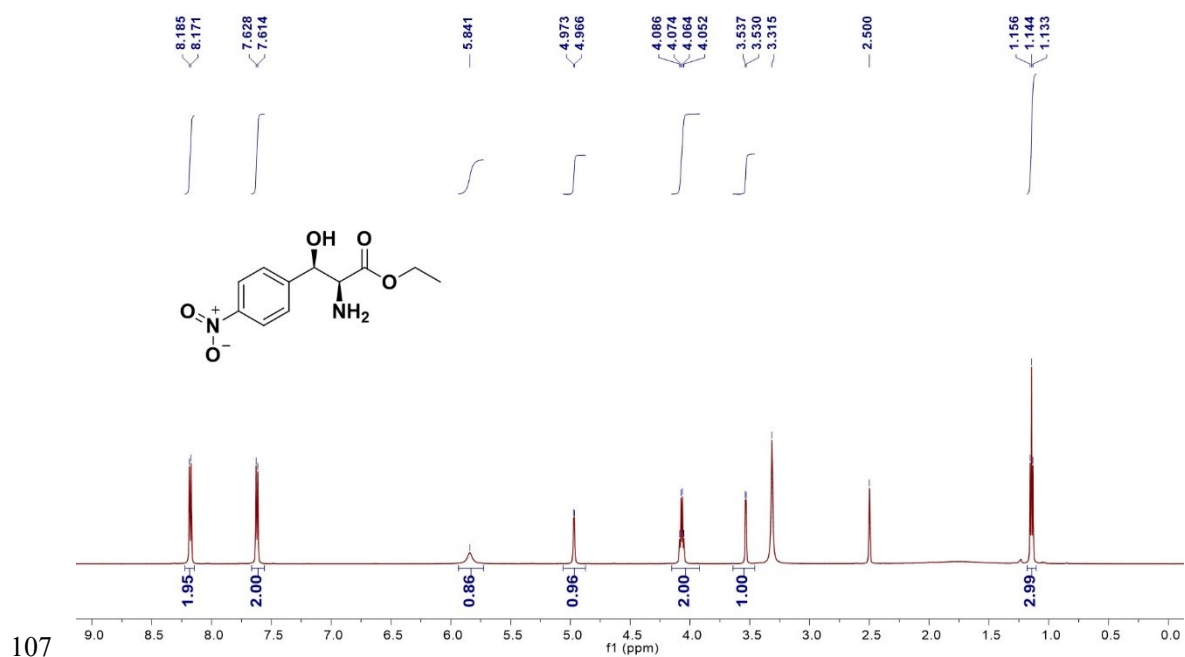

107  
 108 **Figure S12.** <sup>1</sup>H- NMR spectra of ethyl (2*S*,3*R*)-2-amino-3-hydroxy-3-(4-  
 109 nitrophenyl)propanoate (**3**). <sup>1</sup>H NMR (600 MHz, DMSO-*d*<sub>6</sub>) δ (ppm) = 8.18 (d, *J* =  
 110 8.6 Hz, 2H), 7.62 (d, *J* = 8.4 Hz, 2H), 5.84 (s, 1H), 4.97 (d, *J* = 4.2 Hz, 1H), 4.07 (q, *J*  
 111 = 7.2 Hz, 2H), 3.53 (d, *J* = 4.2 Hz, 1H), 1.14 (t, *J* = 7.2 Hz, 3H).

112



113 **Figure S13.**

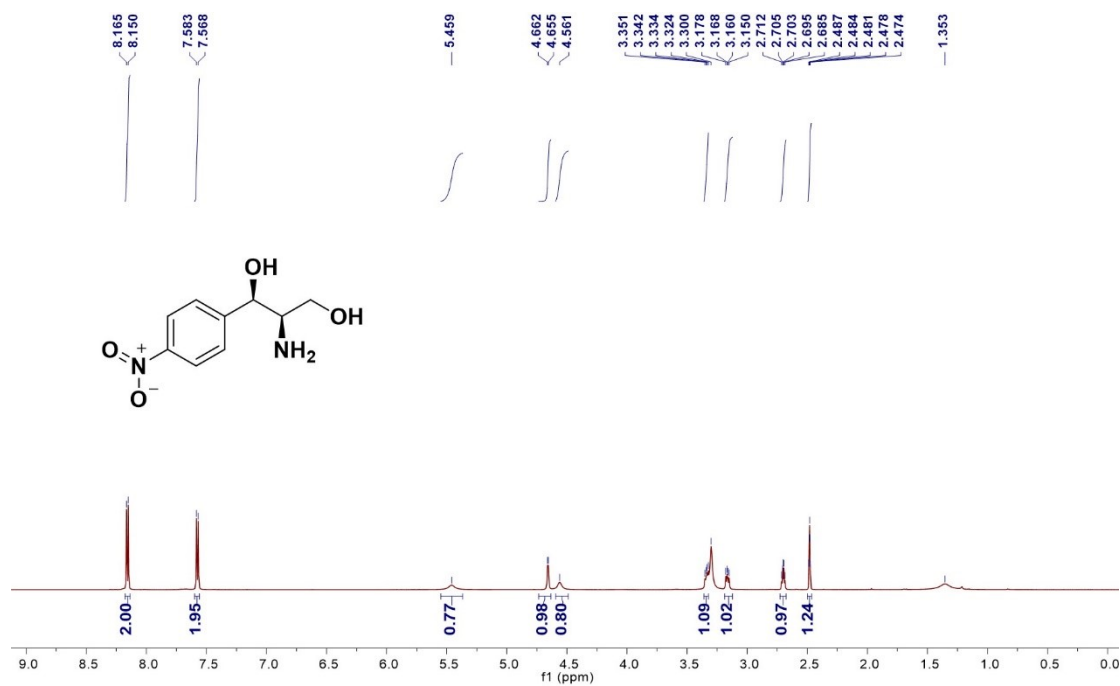

114

115 **Figure S13.** <sup>1</sup>H- NMR spectra of (1*R*,2*R*)-2-amino-1-(4-nitrophenyl)propane-1,3-diol

116 (4). <sup>1</sup>H NMR (600 MHz, DMSO-*d*<sub>6</sub>) δ (ppm) = 8.16 (d, *J* = 9.0 Hz, 2H), 7.58 (d, *J* =

117 9.0 Hz, 2H), 5.46 (s, 1H), 4.66 (d, *J* = 4.2 Hz, 1H), 4.56 (s, 1H), 3.34 (dd, *J* = 10.2,

118 5.4 Hz, 1H), 3.16 (dd, *J* = 10.2, 6.0 Hz, 1H), 2.70 (q, *J* = 5.4 Hz, 1H), 2.48-2.47 (m,

119 2H).

120

121 **Figure S14.**

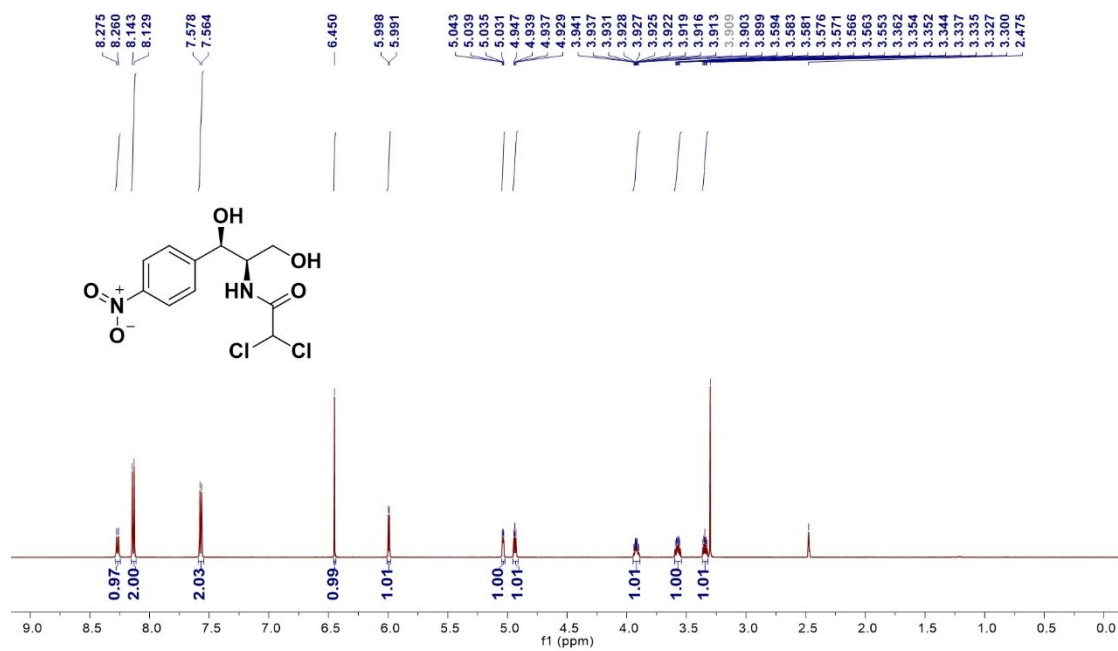

122

123 **Figure S14.** <sup>1</sup>H- NMR spectra of 2,2-dichloro-N-((1R,2R)-1,3-dihydroxy-1-(4-  
 124 nitrophenyl)propan-2-yl)acetamide (**5**). <sup>1</sup>H NMR (600 MHz, DMSO-*d*<sub>6</sub>) δ (ppm) =  
 125 8.27 (d, *J* = 9.0 Hz, 1H), 8.14 (d, *J* = 8.4 Hz, 2H), 7.57 (d, *J* = 8.4 Hz, 2H), 6.45 (s,  
 126 1H), 5.99 (d, *J* = 4.2 Hz, 1H), 5.04 (dd, *J* = 4.8, 2.4 Hz, 1H), 4.94 (dd, *J* = 6.0, 4.8 Hz,  
 127 1H), 4.11-3.88 (m, 1H), 3.59-3.55 (m, 1H), 3.36-3.33 (m, 1H).
